# Supplementary material for: Association of Ginseng Consumption With All-cause and Cause-specific Mortality: Shanghai Women’s Health Study
Source: PubMed Central journal article supplement (PMC9424189; doi:10.2188/jea.je20210393), 2022-10-05
Supplement: je-32-469-s001.pdf [file je-32-469-s001.pdf]

**eTable 1. HRs<sup>a</sup> and 95% CIs of mortality associated with short term and long term duration of ginseng use (years), Shanghai Women's Health Study, 1996-2016.**

| Ginseng Consumption            | Adjusted HR (95% CI) <sup>a</sup><br>among consumers for specific health benefits against existing illness <sup>b</sup> |                   |            |                   | Adjusted HR (95% CI) <sup>a</sup><br>among consumers for other reasons <sup>c</sup> |                    |            |                   |
|--------------------------------|-------------------------------------------------------------------------------------------------------------------------|-------------------|------------|-------------------|-------------------------------------------------------------------------------------|--------------------|------------|-------------------|
|                                | Deaths (N)                                                                                                              | < 3 years         | Deaths (N) | ≥ 3 years         | Deaths (N)                                                                          | < 3 years          | Deaths (N) | ≥ 3 years         |
| <i>All causes</i>              |                                                                                                                         |                   |            |                   |                                                                                     |                    |            |                   |
| Never                          | 3,427                                                                                                                   | 1.00              | 3,427      | 1.00              | 3,427                                                                               | 1.00               | 3,427      | 1.00              |
| American/White ginseng         | 35                                                                                                                      | 1.29 (0.90, 1.85) | 103        | 1.22 (0.99, 1.49) | 2                                                                                   | 0.69 (0.18, 2.57)  | 5          | 0.99 (0.42, 2.30) |
| <i>Cardiovascular diseases</i> |                                                                                                                         |                   |            |                   |                                                                                     |                    |            |                   |
| Never                          | 1,049                                                                                                                   | 1.00              | 1,049      | 1.00              | 1,049                                                                               | 1.00               | 1,049      | 1.00              |
| American/White ginseng         | 7                                                                                                                       | 0.72 (0.32, 1.62) | 33         | 1.13 (0.79, 1.64) | 2                                                                                   | 2.98 (0.79, 11.20) | 2          | 1.47 (0.38, 5.62) |
| <i>Cancer</i>                  |                                                                                                                         |                   |            |                   |                                                                                     |                    |            |                   |
| Never                          | 1,551                                                                                                                   | 1.00              | 1,551      | 1.00              | 1,551                                                                               | 1.00               | 1,551      | 1.00              |
| American/White ginseng         | 12                                                                                                                      | 1.21 (0.68, 2.17) | 30         | 0.97 (0.67, 1.40) | 0                                                                                   | -                  | 2          | 0.78 (0.19, 3.13) |
| <i>Other disease causes</i>    |                                                                                                                         |                   |            |                   |                                                                                     |                    |            |                   |
| Never                          | 827                                                                                                                     | 1.00              | 827        | 1.00              | 827                                                                                 | 1.00               | 827        | 1.00              |
| American/White ginseng         | 16                                                                                                                      | 1.99 (1.20, 3.30) | 40         | 1.57 (1.12, 2.19) | 0                                                                                   | -                  | 1          | 0.91 (0.13, 6.66) |

BMI, body mass index, CI, confidence interval, HR, hazard ratio, WHR, waist-to-hip ratio.

<sup>a</sup> Adjustment: age, income, marriage status, education, menopause status, comorbidity (hypertension, diabetes), exercise, WHR, BMI, diet, vitamin and calcium supplements
